# Supplementary material for: Temporal Changes in Fecal Unabsorbed Carbohydrates Relative to Perturbations in Gut Microbiome of Neonatal Calves: Emerging of Diarrhea Induced by Extended-Spectrum β-lactamase-Producing Enteroaggregative Escherichia coli
Source: Front Microbiol. 2022 Jul 7;13:883090. doi: 10.3389/fmicb.2022.883090 (PMC9301005; doi:10.3389/fmicb.2022.883090)
Supplement: Supplementary Table 2 — Genomic analysis of 1587 strain. [file Table_2.XLSX]

## Sheet: Sheet1
Table 2 Genomic analysis of 1587 strain.
Isolate	1587
Collection year	2020
Country	China
Source	Dairy calf
Serotype	O101:H9
Antimicrobial resistant gene	blaCTX-M-15,blaTEM-1B, floR,dfrA17, aac(3)-IId,aph(6)-Id,aadA5,aph(3”)-Id,Isa(A), mdf(A), mph(A), tet(M), tet(A), sul2
Virulence gene	ElrA, hylA, cylM, cCF10, agg, tpx, cad, hra, papA_F11, mcmA, terC, afaB, papA_F19, astA, cib, fimH54
Plasmid	repUS43, IncHI2, Col440I
