# Supplementary material for: Temporal Changes in Fecal Unabsorbed Carbohydrates Relative to Perturbations in Gut Microbiome of Neonatal Calves: Emerging of Diarrhea Induced by Extended-Spectrum β-lactamase-Producing Enteroaggregative Escherichia coli
Source: Front Microbiol. 2022 Jul 7;13:883090. doi: 10.3389/fmicb.2022.883090 (PMC9301005; doi:10.3389/fmicb.2022.883090)
Supplement: Supplementary Table 3 — Antibiotic susceptibility analysis of 1587 strain. [file Table_3.xlsx]

## Sheet: Sheet1
Table 3 Antibiotic susceptibility analysis of 1587 strain.
Antibiotics	MIC(μg/mL)1
Tetracycline	256
Trimethoprim-sulfamethoxazole	8/160
Amoxicillin-clavulanate	128/64
Cefepime	16
Aztreonam	>64
Meropenem	0.15
Ampicillin	>256
Cefotaxime	>256
Kanamycin	256
Ciprofloxacin	128
1Reference: He, Z.; Yang, S.; Ma, Y.; Zhang, S.; Cao, Z. Detection of CTX-M-15 Extended-Spectrum β-Lactamases Producing Escherichia coli Isolates from Colostrum and Faeces of Newborn Dairy Calves in China. Pathogens.2021;10,(1162). https://doi.org/10.3390/pathogens10091162
